# Supplementary material
Source: MDPI journal article supplement (https://www.mdpi.com/1424-8247/16/11/1536)
Supplement: s1 [file s1]

## Supplementary Material

### Association of *ABCB1* Polymorphisms with Efficacy and Adverse Drug Reactions of Valproic Acid in Children with Epilepsy

Jiahao Zhu <sup>1,2</sup>, Jieluan Lu <sup>1</sup>, Yaodong He <sup>1,2</sup>, Xianhuan Shen <sup>1,2</sup>, Hanbing Xia <sup>2</sup>, Wenzhou Li <sup>2</sup>, Jianping Zhang <sup>1</sup>, Xiaomei Fan <sup>2,\*</sup>

\* Correspondence: Xiaomei Fan: xmfane@163.com

#### 1 Supplementary Tables

**Table S1** Comparison of *ABCB1* rs3789243 genotypes distribution in the persistent seizure and seizure-free groups

| Genetic Model   | Genotype         | Persistent Seizure (n=61) | Seizure-Free (n=109) | OR (95% CI)      | p-value |
|-----------------|------------------|---------------------------|----------------------|------------------|---------|
| Allele contrast | C vs. T          | 78 (63.9%)                | 143 (65.6%)          | 1.00             | 0.758   |
|                 |                  | 44 (36.1%)                | 75 (34.4%)           | 0.93 (0.59-1.48) |         |
| Codominant      | CC vs. CT vs. TT | 24 (39.3%)                | 46 (42.2%)           | 1.00             | 0.940   |
|                 |                  | 30 (49.2%)                | 51 (46.8%)           | 0.89 (0.45-1.73) |         |
|                 |                  | 7 (11.5%)                 | 12 (11.0%)           | 0.89 (0.31-2.57) |         |
| Dominant        | CC vs. CT + TT   | 24 (39.3%)                | 46 (42.2%)           | 1.00             | 0.720   |
|                 |                  | 37 (60.7%)                | 63 (57.8%)           | 0.89 (0.47-1.68) |         |
| Recessive       | CC + CT vs. TT   | 54 (88.5%)                | 97 (89.0%)           | 1.00             | 0.930   |
|                 |                  | 7 (11.5%)                 | 12 (11.0%)           | 0.95 (0.35-2.57) |         |
| Overdominant    | CC + TT vs. CT   | 31 (50.8%)                | 58 (53.2%)           | 1.00             | 0.760   |
|                 |                  | 30 (49.2%)                | 51 (46.8%)           | 0.91 (0.49-1.70) |         |
| Log-additive    | CC vs. TT        | 24 (39.3%)                | 46 (42.2%)           | 1.00             | 0.750   |
|                 |                  | 7 (11.5%)                 | 12 (11.0%)           | 0.93 (0.58-1.49) |         |

**Table S2** Comparison of *ABCB1* rs1128503 genotypes distribution in children with epilepsy with or without VPA-induced gADRs

| Genetic Model   | Genotype         | Patients with gADRs (n=56) | Patients without gADRs (n=114) | OR (95% CI)      | p-value |
|-----------------|------------------|----------------------------|--------------------------------|------------------|---------|
| Allele contrast | C vs. T          | 40 (35.7%)                 | 79 (34.6%)                     | 1.00             | 0.850   |
|                 |                  | 72 (64.3%)                 | 149 (65.4%)                    | 1.05 (0.65-1.68) |         |
| Codominant      | CC vs. CT vs. TT | 7 (12.5%)                  | 10 (8.8%)                      | 1.00             | 0.690   |
|                 |                  | 26 (46.4%)                 | 59 (51.8%)                     | 1.59 (0.54-4.63) |         |
|                 |                  | 23 (41.1%)                 | 45 (39.5%)                     | 1.37 (0.46-4.07) |         |
| Dominant        | CC vs. CT + TT   | 7 (12.5%)                  | 10 (8.8%)                      | 1.00             | 0.450   |
|                 |                  | 49 (87.5%)                 | 104 (91.2%)                    | 1.49 (0.53-4.14) |         |
| Recessive       | CC + CT vs. TT   | 33 (58.9%)                 | 69 (60.5%)                     | 1.00             | 0.840   |
|                 |                  | 23 (41.1%)                 | 45 (39.5%)                     | 0.94 (0.49-1.80) |         |
| Overdominant    | CC + TT vs. CT   | 30 (53.6%)                 | 55 (48.2%)                     | 1.00             | 0.510   |
|                 |                  | 26 (46.4%)                 | 59 (51.8%)                     | 1.24 (0.65-2.35) |         |
| Log-additive    | CC vs. TT        | 7 (12.5%)                  | 10 (8.8%)                      | 1.00             | 0.840   |
|                 |                  | 23 (41.1%)                 | 45 (39.5%)                     | 1.05 (0.64-1.73) |         |

**Table S3** Comparison of *ABCB1* rs1128503 genotypes distribution in children with epilepsy with or without VPA-induced cADRs

| Genetic Model   | Genotype         | Patients with cADRs (n=19) | Patients without cADRs (n=151) | OR (95% CI)       | p-value |
|-----------------|------------------|----------------------------|--------------------------------|-------------------|---------|
| Allele contrast | C vs. T          | 18 (47.4%)                 | 101 (33.4%)                    | 1.00              | 0.090   |
|                 |                  | 20 (52.6%)                 | 201 (66.6%)                    | 1.79 (0.91-3.54)  |         |
| Codominant      | CC vs. CT vs. TT | 4 (21.1%)                  | 13 (8.6%)                      | 1.00              | 0.200   |
|                 |                  | 10 (52.6%)                 | 75 (49.7%)                     | 2.31 (0.63-8.47)  |         |
|                 |                  | 5 (26.3%)                  | 63 (41.7%)                     | 3.88 (0.91-16.43) |         |
| Dominant        | CC vs. CT + TT   | 4 (21.1%)                  | 13 (8.6%)                      | 1.00              | 0.120   |
|                 |                  | 15 (78.9%)                 | 138 (91.4%)                    | 2.83 (0.82-9.79)  |         |
| Recessive       | CC + CT vs. TT   | 14 (73.7%)                 | 88 (58.3%)                     | 1.00              | 0.190   |
|                 |                  | 5 (26.3%)                  | 63 (41.7%)                     | 2.00 (0.69-5.85)  |         |
| Overdominant    | CC + TT vs. CT   | 9 (47.4%)                  | 76 (50.3%)                     | 1.00              | 0.810   |
|                 |                  | 10 (52.6%)                 | 75 (49.7%)                     | 0.89 (0.34-2.31)  |         |
| Log-additive    | CC vs. TT        | 4 (21.1%)                  | 13 (8.6%)                      | 1.00              | 0.078   |
|                 |                  | 5 (26.3%)                  | 63 (41.7%)                     | 1.93 (0.93-4.03)  |         |

**Table S4** Comparison of *ABCB1* rs1128503 genotypes distribution in children with epilepsy with or without VPA-induced nADRs

| Genetic Model   | Genotype         | Patients with nADRs ( <i>n</i> =48) | Patients without nADRs ( <i>n</i> =122) | OR (95% CI)      | <i>p</i> -value |
|-----------------|------------------|-------------------------------------|-----------------------------------------|------------------|-----------------|
| Allele contrast | C vs. T          | 33 (34.4%)                          | 86 (35.2%)                              | 1.00             | 0.880           |
|                 |                  | 63 (65.6%)                          | 158 (64.8%)                             | 0.96 (0.59-1.58) |                 |
| Codominant      | CC vs. CT vs. TT | 6 (12.5%)                           | 11 (9.0%)                               | 1.00             | 0.560           |
|                 |                  | 21 (43.8%)                          | 64 (52.5%)                              | 1.66 (0.55-5.04) |                 |
|                 |                  | 21 (43.8%)                          | 47 (38.5%)                              | 1.22 (0.40-3.74) |                 |
| Dominant        | CC vs. CT + TT   | 6 (12.5%)                           | 11 (9.0%)                               | 1.00             | 0.500           |
|                 |                  | 42 (87.5%)                          | 111 (91.0%)                             | 1.44 (0.50-4.15) |                 |
| Recessive       | CC + CT vs. TT   | 27 (56.2%)                          | 75 (61.5%)                              | 1.00             | 0.530           |
|                 |                  | 21 (43.8%)                          | 47 (38.5%)                              | 0.81 (0.41-1.59) |                 |
| Overdominant    | CC + TT vs. CT   | 27 (56.2%)                          | 58 (47.5%)                              | 1.00             | 0.310           |
|                 |                  | 21 (43.8%)                          | 64 (52.5%)                              | 1.42 (0.72-2.78) |                 |
| Log-additive    | CC vs. TT        | 6 (12.5%)                           | 11 (9.0%)                               | 1.00             | 0.870           |
|                 |                  | 21 (43.8%)                          | 47 (38.5%)                              | 0.96 (0.57-1.62) |                 |

**Table S5** Comparison of *ABCB1* rs3789243 genotypes distribution in children with epilepsy with or without VPA-induced nADRs

| Genetic Model   | Genotype         | Patients with nADRs (n=48) | Patients without nADRs (n=122) | OR (95% CI)      | p-value |
|-----------------|------------------|----------------------------|--------------------------------|------------------|---------|
| Allele contrast | C vs. T          | 62 (64.6%)                 | 159 (65.2%)                    | 1.00             | 0.920   |
|                 |                  | 34 (35.4%)                 | 85 (34.8%)                     | 0.97 (0.59-1.60) |         |
| Codominant      | CC vs. CT vs. TT | 19 (39.6%)                 | 51 (41.8%)                     | 1.00             | 0.930   |
|                 |                  | 24 (50.0%)                 | 57 (46.7%)                     | 0.88 (0.43-1.80) |         |
|                 |                  | 5 (10.4%)                  | 14 (11.5%)                     | 1.04 (0.33-3.29) |         |
| Dominant        | CC vs. CT + TT   | 19 (39.6%)                 | 51 (41.8%)                     | 1.00             | 0.790   |
|                 |                  | 29 (60.4%)                 | 71 (58.2%)                     | 0.91 (0.46-1.80) |         |
| Recessive       | CC + CT vs. TT   | 43 (89.6%)                 | 108 (88.5%)                    | 1.00             | 0.840   |
|                 |                  | 5 (10.4%)                  | 14 (11.5%)                     | 1.11 (0.38-3.28) |         |
| Overdominant    | CC + TT vs. CT   | 24 (50.0%)                 | 65 (53.3%)                     | 1.00             | 0.700   |
|                 |                  | 24 (50.0%)                 | 57 (46.7%)                     | 0.88 (0.45-1.71) |         |
| Log-additive    | CC vs. TT        | 19 (39.6%)                 | 51 (41.8%)                     | 1.00             | 0.920   |
|                 |                  | 5 (10.4%)                  | 14 (11.5%)                     | 0.97 (0.59-1.62) |         |
